# Supplementary material
Source: ML conference proceedings conference paper supplement (https://proceedings.neurips.cc/paper_files/paper/2016/hash/861dc9bd7f4e7dd3cccd534d0ae2a2e9-Abstract.html)
Supplement: Supplementary file [file 861dc9bd7f4e7dd3cccd534d0ae2a2e9-Supplemental.zip]

---

# Supplementary Materials for Interaction Screening: Efficient and Sample-Optimal Learning of Ising Models

---

Marc Vuffray<sup>1</sup>, Sidhant Misra<sup>2</sup>, Andrey Y. Lokhov<sup>1,3</sup>, and Michael Chertkov<sup>1,3,4</sup>

<sup>1</sup>Theoretical Division T-4, Los Alamos National Laboratory, Los Alamos, NM 87545, USA

<sup>2</sup>Theoretical Division T-5, Los Alamos National Laboratory, Los Alamos, NM 87545, USA

<sup>3</sup>Center for Nonlinear Studies, Los Alamos National Laboratory, Los Alamos, NM 87545, USA

<sup>4</sup>Skolkovo Institute of Science and Technology, 143026 Moscow, Russia

{vuffray, sidhant, lokhov, chertkov}@lanl.gov

We provide in Section 1 detailed proofs of Lemma 1, 2, 3 and 4 related to the gradient concentration of the Interaction-Screening Objective (ISO). Detailed proofs of Lemma 5, 6, 7 and 8 related to the restricted strong-convexity of the ISO can be found in Section 2.

## 1 Gradient Concentration

**Lemma 1.** *For any Ising model with  $p$  spins and for all  $l \neq u \in V$*

$$\mathbb{E} [X_{ul}(\underline{\theta}_u^*)] = 0. \quad (1)$$

*Proof.* By direct computation, we find that

$$\begin{aligned} \mathbb{E} [X_{ul}(\underline{\theta}_u^*)] &= \mathbb{E} \left[ -\sigma_u \sigma_l \exp \left( - \sum_{i \in \partial u} \theta_{ui}^* \sigma_u \sigma_i \right) \right] \\ &= \frac{-1}{Z} \sum_{\underline{\sigma}} \sigma_u \sigma_l \exp \left( \sum_{(i,j) \in E} \theta_{ij}^* \sigma_i \sigma_j - \sum_{i \in \partial u} \theta_{ui}^* \sigma_u \sigma_i \right) = 0, \end{aligned} \quad (2)$$

where in the last line we use the fact that the exponential terms involving  $\sigma_u$  cancel, implying that the sum over  $\sigma_u \in \{-1, +1\}$  is zero.  $\square$

**Lemma 2.** *For any Ising model with  $p$  spins and for all  $l \neq u \in V$*

$$\mathbb{E} [X_{ul}(\underline{\theta}_u^*)^2] = 1. \quad (3)$$

*Proof.* As a result of direct evaluation one derives

$$\begin{aligned}
\mathbb{E} \left[ X_{ul} (\underline{\theta}_u^*)^2 \right] &= \mathbb{E} \left[ \exp \left( -2 \sum_{i \in \partial u} \theta_{ui}^* \sigma_u \sigma_i \right) \right] \\
&= \frac{1}{Z} \sum_{\underline{\sigma}} \exp \left( \sum_{(i,j) \in E, i,j \neq u} \theta_{ij}^* \sigma_i \sigma_j - \sum_{i \in \partial u} \theta_{ui}^* \sigma_u \sigma_i \right) \\
&= \frac{1}{Z} \sum_{\underline{\sigma}} \exp \left( \sum_{(i,j) \in E, i,j \neq u} \theta_{ij}^* \sigma_i \sigma_j + \sum_{i \in \partial u} \theta_{ui}^* \sigma_u \sigma_i \right) \\
&= 1.
\end{aligned} \tag{4}$$

Notice that in the second line the first sum over edges (under the exponential) does not depend on  $\sigma_u$ . Furthermore, the first sum is invariant under the change of variables,  $\sigma_u \rightarrow -\sigma_u$ , while the second sum changes sign. This transformation results in appearance of the partition function in the numerator.  $\square$

**Lemma 3.** *For any Ising model with  $p$  spins, with maximum degree  $d$  and maximum coupling intensity  $\beta$ , it is guaranteed that for all  $l \neq u \in V$*

$$|X_{ul} (\underline{\theta}_u^*)| \leq \exp(\beta d). \tag{5}$$

*Proof.* Observe that components of  $\underline{\theta}_u^*$  are smaller than  $\beta$  and at most  $d$  of them are non-zero. Recall that spins are binary,  $\{-1, +1\}$ , which results in the following estimate

$$\begin{aligned}
|X_{ul} (\underline{\theta}_u^*)| &= \left| -\sigma_u \sigma_l \exp \left( - \sum_{i \in \partial u} \theta_{ui}^* \sigma_u \sigma_i \right) \right| \\
&\leq \exp \left( - \sum_{i \in \partial u} \theta_{ui}^* \sigma_u \sigma_i \right) \\
&\leq \exp(\beta d).
\end{aligned} \tag{6}$$

$\square$

**Lemma 4.** *For any Ising model with  $p$  spins, with maximum degree  $d$  and maximum coupling intensity  $\beta$ . For any  $\epsilon_3 > 0$ , if the number of observation satisfies  $n \geq \exp(2\beta d) \ln \frac{2p}{\epsilon_3}$ , then the following bound holds with probability at least  $1 - \epsilon_3$ :*

$$\|\nabla \mathcal{S}_n (\underline{\theta}_u^*)\|_\infty \leq 2 \sqrt{\frac{\ln \frac{2p}{\epsilon_3}}{n}}. \tag{7}$$

*Proof.* Let us first show that every term is individually bounded by the RHS of (7) with high-probability. We further use the union bound to prove that all components are uniformly bounded with high-probability. Utilizing Lemma 1, Lemma 2 and Lemma 3 we apply the Bernstein's Inequality

$$\mathbb{P} \left[ \left| \frac{\partial}{\partial \theta_{ul}} \mathcal{S}_n (\underline{\theta}_u^*) \right| > t \right] \leq 2 \exp \left( - \frac{\frac{1}{2} t^2 n}{1 + \frac{1}{3} \exp(\beta d) t} \right). \tag{8}$$

Inverting the following relation

$$s = \frac{\frac{1}{2} t^2 n}{1 + \frac{1}{3} \exp(\beta d) t}, \tag{9}$$

and substituting the result in the Eq. (8) one derives

$$\mathbb{P} \left[ \left| \frac{\partial}{\partial \theta_{ul}} \mathcal{S}_n (\underline{\theta}_u^*) \right| > \frac{1}{3} \left( u + \sqrt{\frac{18}{\exp(\beta d)} u + u^2} \right) \right] \leq 2 \exp(-s), \tag{10}$$

where  $u = \frac{s}{n} \exp(\beta d)$ .

For  $n \geq s \exp(2\beta d)$ , we can simplify Eq. (10) to have an expression independent of  $\beta$  and  $d$

$$\mathbb{P} \left[ \left| \frac{\partial}{\partial \theta_{ul}} \mathcal{S}_n(\theta_u^*) \right| > 2\sqrt{\frac{s}{n}} \right] \leq 2 \exp(-s). \quad (11)$$

Using  $s = \ln \frac{2p}{\epsilon_3}$  and the union bound on every component of the gradient leads to the desired result.  $\square$

## 2 Restricted Strong-Convexity

We recall that the remainder of the first-order Taylor-expansion of the ISO, is the following quantity

$$\delta \mathcal{S}_n(\Delta_u, \theta^*) = \frac{1}{n} \sum_{k=1}^n \exp \left( - \sum_{i \in \partial u} \theta_{ui}^* \sigma_u^{(k)} \sigma_i^{(k)} \right) f \left( \sum_{i \in V \setminus u} \Delta_{ui} \sigma_u^{(k)} \sigma_i^{(k)} \right), \quad (12)$$

where the function  $f(z)$  appearing in Eq. (12) reads

$$f(z) := e^{-z} - 1 + z. \quad (13)$$

**Lemma 5.** *For all  $\Delta_u \in \mathbb{R}^{p-1}$ , the remainder of the first-order Taylor expansion admits the following lower-bound*

$$\delta \mathcal{S}_n(\Delta_u, \theta^*) \geq \frac{e^{-\beta d}}{2 + \|\Delta_u\|_1} \Delta_u^\top H^n \Delta_u \quad (14)$$

where the matrix  $H^n$  is an empirical covariance matrix with elements  $i, j \in V \setminus u$

$$H_{ij}^n = \frac{1}{n} \sum_{k=1}^n \sigma_i^{(k)} \sigma_j^{(k)}. \quad (15)$$

*Proof.* We start to prove a lower-bound on the function  $f(z)$  valid for all  $z \in \mathbb{R}$ ,

$$f(z) \geq \frac{z^2}{2 + |z|}. \quad (16)$$

To see this, define an auxiliary function  $g(z)$  as follows

$$\begin{aligned} g(z) &:= (2 + |z|) f(z) - z^2 \\ &= (2 + |z|) (e^{-z} - 1 + z) - z^2. \end{aligned} \quad (17)$$

We show that  $g(z)$  achieves its minimum at  $g(0) = 0$ . Observe that the first derivative of  $g(z)$  vanishes at zero from both the negative and positive side

$$\lim_{z \rightarrow 0_+} \frac{d}{dz} g(z) = \lim_{z \rightarrow 0_-} \frac{d}{dz} g(z) = 0. \quad (18)$$

Moreover for all  $z > 0$  the second derivative of  $g(z)$  is non-negative

$$\frac{d^2}{dz^2} g(z) = ze^{-z} > 0. \quad (19)$$

A similar result holds for  $z < 0$

$$\frac{d^2}{dz^2} g(z) = 4(e^{-z} - 1) - ze^{-z} > 0, \quad (20)$$

proving that for all  $z$ ,  $g(z) \geq g(0) = 0$ .

Combining Eq. (16) with the straightforward inequalities

$$\left| \sum_{i \in V \setminus u} \Delta_{ui} \sigma_u^{(k)} \sigma_i^{(k)} \right| \leq \|\Delta_u\|_1, \quad (21)$$

and

$$\exp\left(-\sum_{i \in \partial u} \theta_{ui}^* \sigma_u^{(k)} \sigma_i^{(k)}\right) \geq \exp(-\beta d), \quad (22)$$

leads us to the following lower-bound on the remainder of the first-order Taylor expansion of the ISO

$$\begin{aligned} \delta \mathcal{S}_n(\Delta_u, \theta^*) &\geq \frac{e^{-\beta d}}{2 + \|\Delta_u\|_1} \frac{1}{n} \sum_{k=1}^n \left( \sum_{i \in V \setminus u} \Delta_{ui} \sigma_u^{(k)} \sigma_i^{(k)} \right)^2 \\ &= \frac{e^{-\beta d}}{2 + \|\Delta_u\|_1} \Delta_u^\top H^n \Delta_u, \end{aligned} \quad (23)$$

where in the last line we used the trivial identity  $\sigma_u^{(k)} \cdot \sigma_u^{(k)} = 1$ .  $\square$

**Lemma 6.** *Consider an Ising model with  $p$  spins, with maximum degree  $d$  and maximum coupling intensity  $\beta$ . Let  $\delta > 0$ ,  $\epsilon_4 > 0$  and  $n \geq \frac{2}{\delta^2} \ln \frac{p^2}{\epsilon_4}$ . Then with probability greater than  $1 - \epsilon_4$ , we have for all  $i, j \in V \setminus u$*

$$|H_{ij}^n - H_{ij}| \leq \delta, \quad (24)$$

where the matrix  $H$  is the covariance matrix with elements  $i, j \in V \setminus u$

$$H_{ij} = \mathbb{E}[\sigma_i \sigma_j]. \quad (25)$$

*Proof.* We recall that the matrix elements of the empirical covariance matrix read

$$H_{ij}^n = \frac{1}{n} \sum_{k=1}^n \sigma_i^{(k)} \sigma_j^{(k)}. \quad (26)$$

Since  $|\sigma_i^{(k)} \sigma_j^{(k)}| \leq 1$  using Hoeffding's inequality, we have

$$\mathbb{P}[|H_{ij}^n - H_{ij}| \geq \delta] \leq 2 \exp\left(-\frac{n\delta^2}{2}\right). \quad (27)$$

As  $H_{ij}^n$  is symmetric we use the union bound over the elements  $i < j \in V \setminus u$  to get

$$\mathbb{P}[|H_{ij}^n - H_{ij}| \geq \delta \quad \forall i, j \in V \setminus u] \leq 1 - p^2 \exp\left(-\frac{n\delta^2}{2}\right). \quad (28)$$

$\square$

**Lemma 7.** *Consider an Ising model with  $p$  spins, with maximum degree  $d$  and maximum coupling intensity  $\beta$ . For all  $\Delta_u \in \mathbb{R}^{p-1}$  the following bound holds*

$$\Delta_u^\top H \Delta_u \geq \frac{e^{-2\beta d}}{d+1} \|\Delta_u\|_2^2. \quad (29)$$

*Proof.* Our proof strategy here follows [1, Cor. 3.1]. Notice that the probability measure of the Ising model is symmetric with respect to the sign flip, i.e.  $\mu(\sigma_1, \dots, \sigma_p) = \mu(-\sigma_1, \dots, -\sigma_p)$ . Thus any spin has zero mean, which implies that for every  $\Delta_u \in \mathbb{R}^{p-1}$

$$\mathbb{E}\left[\left(\sum_{i \in V \setminus u} \Delta_{ui} \sigma_i\right)\right] = 0. \quad (30)$$

This allows to reinterpret the left-hand side of Eq. (29) as a variance, using that  $\sigma_u^2 = 1$ ,

$$\begin{aligned} \Delta_u^\top H \Delta_u &= \sum_{i, j \in V \setminus u} \Delta_{ui} \mathbb{E}[\sigma_i \sigma_j] \Delta_{uj} \\ &= \mathbb{E}\left[\left(\sum_{i \in V \setminus u} \Delta_{ui} \sigma_i\right)^2\right] \\ &= \text{Var}\left[\sum_{i \in V \setminus u} \Delta_{ui} \sigma_i\right]. \end{aligned} \quad (31)$$

Construct a subset  $A \subset V$  recursively as follows: (i) let  $i_0 = \operatorname{argmax}_{j \in V \setminus u} \Delta_{uj}^2$  and define  $A_0 = \{i_0\}$ , (ii) given  $A_t = \{i_0, \dots, i_t\}$ , let  $B_t = \{j \in V \setminus A_t \mid \partial j \cap A_t = \emptyset\}$  and  $i_{t+1} = \operatorname{argmax}_{j \in B_t \setminus u} \Delta_{uj}^2$  and set  $A_{t+1} = A_t \cup \{i_{t+1}\}$ , (iii) terminate when  $B_t \setminus u = \emptyset$  and declare  $A = A_t$ .

The set  $A$  possesses the following two main properties. First, every node  $i \in A$  does not have any neighbors in  $A$  and, second,

$$(d+1) \sum_{i \in A} \Delta_{ui}^2 \geq \sum_{i \in V \setminus u} \Delta_{ui}^2. \quad (32)$$

We apply the law of total variance to (31) by conditioning on the set of spins  $\underline{\sigma}_{A^c}$  with indexes belonging to the complementary set  $A^c$ ,

$$\begin{aligned} \operatorname{Var} \left[ \sum_{i \in V \setminus u} \Delta_{ui} \sigma_i \right] &\geq \mathbb{E} \left[ \operatorname{Var} \left[ \sum_{i \in V \setminus u} \Delta_{ui} \sigma_i \mid \underline{\sigma}_{A^c} \right] \right] \\ &= \sum_{i \in A} \Delta_{ui}^2 \mathbb{E} [\operatorname{Var} [\sigma_i \mid \underline{\sigma}_{A^c}]], \end{aligned} \quad (33)$$

where in the last line one uses that the spins in  $A$  are conditionally independent given their neighbors  $\underline{\sigma}_{A^c}$ . One concludes the proof by using relation (32) and the fact that the conditional variance of a spin given its neighbors is bounded from below:

$$\begin{aligned} \operatorname{Var} [\sigma_i \mid \underline{\sigma}_{A^c}] &= 1 - \tanh^2 \left( \sum_{j \in \partial i} \theta_{ij}^* \sigma_j \right) \\ &\geq \exp(-2\beta d). \end{aligned} \quad (34)$$

□

**Lemma 8.** Consider an Ising model with  $p$  spins, with maximum degree  $d$  and maximum coupling intensity  $\beta$ . For all  $\epsilon_4 > 0$  and  $R > 0$ , when  $n \geq 2^{11} d^2 (d+1)^2 e^{4\beta d} \ln \frac{p^2}{\epsilon_4}$  the ISO satisfies, with probability at least  $1 - \epsilon_4$ , the restricted strong convexity condition

$$\delta \mathcal{S}_n(\Delta_u, \theta_u^*) \geq \frac{e^{-3\beta d}}{4(d+1)(1+2\sqrt{d}R)} \|\Delta_u\|_2^2, \quad (35)$$

for all  $\Delta_u \in \mathbb{R}^{p-1}$  such that  $\|\Delta_u\|_1 \leq 4\sqrt{d} \|\Delta_u\|_2$  and  $\|\Delta_u\|_2 \leq R$ .

*Proof.* First we apply Lemma 5 to get the quadratic bound

$$\begin{aligned} \delta \mathcal{S}_n(\Delta_u, \theta^*) &\geq \frac{e^{-\beta d}}{2 + \|\Delta_u\|_1} \Delta_u^\top H^n \Delta_u \\ &\geq \frac{e^{-\beta d}}{2(1+2\sqrt{d}R)} \Delta_u^\top H^n \Delta_u. \end{aligned} \quad (36)$$

Second we use Lemma 7 to bound the quadratic form

$$\begin{aligned} \Delta_u^\top H^n \Delta_u &= \Delta_u^\top H \Delta_u + \Delta_u^\top (H^n - H) \Delta_u \\ &\geq \frac{e^{-2\beta d}}{d+1} \|\Delta_u\|_2^2 + \Delta_u^\top (H^n - H) \Delta_u. \end{aligned} \quad (37)$$

Third we conclude with Lemma 6, controlling randomness independently of  $\Delta_u$ . Choosing  $\delta = \frac{e^{-2\beta d}}{32d(d+1)}$ , we get with probability at least  $1 - \epsilon_4$  that

$$\begin{aligned} \Delta_u^\top (H^n - H) \Delta_u &\geq -\frac{e^{-2\beta d}}{32d(d+1)} \|\Delta_u\|_1^2 \\ &\geq -\frac{e^{-2\beta d}}{2(d+1)} \|\Delta_u\|_2^2, \end{aligned} \quad (38)$$

whenever  $n \geq \frac{2}{\delta^2} \ln \frac{p^2}{\epsilon_4} = 2^{11} d^2 (d+1)^2 e^{4\beta d} \ln \frac{p^2}{\epsilon_4}$ . □

## References

- [1] A. Montanari, “Computational implications of reducing data to sufficient statistics,” *Electron. J. Statist.*, vol. 9, no. 2, pp. 2370–2390, 2015.
